# Supplementary material
Source: HighWire-hosted journal article supplement (doi:10.1101/rna.079421.122)
Supplement: Supplemental_Legends.docx [file Supplemental_Legends.docx]

**FIG. S1.** (A) Chemical structures of the wobble uridine modifications. (B) A schematic view of the domain composition of ALKBH8. RRM is the RNA recognition motif, AlkB-like is the alpha-ketoglutarate-dependent dioxygenase-like domain, and MTase is the S-adenosyl-L-methionine (SAM) dependent methyltransferase domain. (C) Immunoprecipitation of FLAG-ALKBH8 by anti-FLAG antibody during RIP. Protein presence verified by western blot with anti-FLAG antibody. (D) Proportions of CPM normalized values of different non-templated 3ˈ terminal extensions in selected highly represented tRNAs in the RIP experiment. The color code is explained above the graph.

**FIG. S2.** LC-MS analysis uncovered the presence of mcm5U and mcm5s2U in tRNALys(UUU). (A) Denaturing gel analysis of affinity-purified tRNAGlu(CUC) and tRNALys(UUU). RNAs were stained with ethidium bromide. The fragment corresponding to the migration of the purified tRNA was excised from the gel, eluted, and the purified tRNA was subjected to LC-MS analysis. (B) Mass spectrometric analysis at the nucleoside level of the tRNALys(UUU) isolated from HEK293T cells. The extracted ion chromatograms of mcm5s2U (left) and mcm5U (right) are shown.

**FIG. S3.** RNAs detected in ALKBH8 immunoprecipitated samples are not unspecifically pulled down by GFP nor by the beads without FLAG antibodies. RNA immunoprecipitation by FLAG-ALKBH8. Additional RT-PCR controls accompanying main Fig. 4C. (A) RT-PCR no template control for reactions containing oligonucleotides annealing to regions of selected RNAs (marked on top) show only primer signal. The control RT-PCR detection of SNORD34 from RNA isolated from whole cell lysate (input) is shown on the right. No template is a PCR reaction without any cDNA template. Input is RNA isolated from whole cell extract. (B) RT-PCR detection of selected RNAs (marked on top) from whole cell extract (input). No RT-PCR product was obtained from RIP samples performed with beads without anti-FLAG antibody (no Ab IP, negative control) nor in samples where FLAG-GFP was used as a control (GFP) by using the HEK293T cell line with inducible expression of FLAG-GFP. ALKBH8 is a HEK293T stable cell line with inducible expression of FLAG-ALKBH8.

**FIG. S4.** Motif analysis of ALKBH8 bound targets identified by HITS-CLIP. (A) The HOMER analysis of RNA consensus sequences in tRNAs. The three most significant results are displayed. (B) The HOMER analysis of RNA consensus sequences in non-tRNAs. The three most significant results are displayed. (C) The analysis of pentamer motifs shared by tRNAs and non-tRNAs. Pentamers with increased positive log2FC are highlighted in the upper inset.

**Table S1.** List of primers, linkers, and probes used in this study.

**Table S2.** HITS-CLIP tRNAdb contains CPM-normalized numbers of HITS-CLIP reads mapped by BWA to the tRNA database. HITS-CLIP Human Genome contains CPM-normalized numbers and p-values of HITS-CLIP reads mapped by STAR to the human genome database. Only the reads that remained after mapping to the tRNA database were used for this mapping. RIP-seq tRNAdb and RIP-seq Human Genome are analogous to the previous tables but display data from RIP-seq.
